# Supplementary material for: RECOG RL01: correcting GRACE total water storage estimates for global lakes/reservoirs and earthquakes
Source: Copernicus journal article supplement (doi:10.5194/essd-13-2227-2021), 2021-05-21
Supplement: Supplementary file 1 [file essd-13-2227-2021-supplement.pdf]

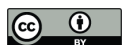

*Supplement of*

## **RECOG RL01: correcting GRACE total water storage estimates for global lakes/reservoirs and earthquakes**

**Simon Deggim et al.**

*Correspondence to:* Simon Deggim ([simon.deggim@hcu-hamburg.de](mailto:simon.deggim@hcu-hamburg.de)) and Annette Eicker ([annette.eicker@hcu-hamburg.de](mailto:annette.eicker@hcu-hamburg.de))

The copyright of individual parts of the supplement might differ from the article licence.

# **S1 List of lakes/reservoirs used for the correction RECOG-LR RL01**

| <b>Lake</b>              | <b>Country</b> | <b>Surface area [km<sup>2</sup>]</b> |
|--------------------------|----------------|--------------------------------------|
| Aberdeen Lake            | Canada         | 1128.2                               |
| Achit Lake               | Mongolia       | 296.2                                |
| Acude Oros Reservoir     | Brazil         | 61.3                                 |
| Albert Lake              | Uganda         | 5401.9                               |
| Alcantara Reservoir      | Spain          | 45.3                                 |
| Allegheny Reservoir      | United States  | 41.4                                 |
| Almanor Lake             | United States  | 104.6                                |
| Alvaro Obregón Reservoir | Mexico         | 74.8                                 |
| Amadjuak Lake            | Canada         | 3033.7                               |
| Angostura Lake           | Mexico         | 566.3                                |
| Apoquitaua Lake          | Brazil         | 125.9                                |
| Aqqikkol Lake            | China          | 355.6                                |
| Argentino Lake           | Argentina      | 1401.9                               |
| Argyle Lake              | Australia      | 829.2                                |
| Assad Lake               | Syria          | 638.6                                |
| Atatürk Lake             | Turkey         | 695.1                                |
| Ayakkum Lake             | China          | 575.1                                |
| Badajós Lake             | Brazil         | 227.4                                |
| Bagre Reservoir          | Burkina Faso   | 167.9                                |
| Baikal Lake              | Russia         | 31924.6                              |
| Baker Lake               | Canada         | 1780.3                               |
| Balaton Lake             | Hungary        | 578.2                                |
| Balbina Reservoir        | Brazil         | 2304.8                               |
| Balkhash Lake            | Kazakhstan     | 17458.8                              |
| Bangweulu Lake           | Zambia         | 2049.1                               |
| Bankim Lake              | Cameroon       | 163.9                                |
| Barna Reservoir          | India          | 46.6                                 |
| Berryessa Lake           | United States  | 66.6                                 |
| Beysehir Lake            | Turkey         | 659.6                                |
| Bisalpur Reservoir       | India          | 59.4                                 |
| Boston Lake              | China          | 999.5                                |
| Bratskoe Reservoir       | Russia         | 4810.8                               |
| Buchanan Lake            | United States  | 80.5                                 |
| Buenos Aires Lake        | Chile          | 1848.2                               |
| Burdekin Reservoir       | Australia      | 210.5                                |
| Buyo Lake                | Ivory Coast    | 508.7                                |
| Cabaliana Lake           | Brazil         | 205.1                                |
| Caddabassa Lake          | Ethiopia       | 91.6                                 |
| Caddo Lake               | United States  | 60.3                                 |
| Cahora Bassa Lake        | Mozambique     | 2047.5                               |
| Canyon Ferry Lake        | United States  | 156.5                                |
| Carey Lake               | Canada         | 247.9                                |
| Caspian Sea              | Kazakhstan     | 378119.3                             |
| Cedar Lake               | Canada         | 2817.3                               |
| Chad Lake                | Chad           | 19346.6                              |
| Chamo Lake               | Ethiopia       | 324.8                                |

| <b>Lake</b>                    | <b>Country</b>   | <b>Surface area [km<sup>2</sup>]</b> |
|--------------------------------|------------------|--------------------------------------|
| Chandil Dam Reservoir          | India            | 33.6                                 |
| Chapala Lake                   | Mexico           | 1127.3                               |
| Chiquita Lake                  | Argentina        | 2011.9                               |
| Choke Canyon Reservoir         | United States    | 55.1                                 |
| Churumuco Lake                 | Mexico           | 288.0                                |
| Claire Lake                    | Canada           | 1325.6                               |
| Coari Lake                     | Brazil           | 646.2                                |
| Colville Lake                  | Canada           | 433.1                                |
| Constance Lake                 | Germany          | 516.0                                |
| Contwoyto Lake                 | Canada           | 1092.5                               |
| Cumberland Lake                | United States    | 159.5                                |
| CW McConaughy Lake             | United States    | 122.1                                |
| Dale Hollow Lake               | United States    | 89.6                                 |
| Dongting Lake                  | China            | 778.7                                |
| Dore Lake                      | Canada           | 634.4                                |
| Dubawnt Lake                   | Canada           | 3628.5                               |
| Edward Lake                    | Zaire            | 2252.5                               |
| Elwell Reservoir               | United States    | 61.9                                 |
| Encoro de Salas Reservoir      | Portugal         | 16.0                                 |
| Enriquillo Lake                | Dominican Republ | 259.5                                |
| Erepecu Lake                   | Brazil           | 628.2                                |
| Erie Lake                      | Canada           | 25691.0                              |
| Eucumbene Lake                 | Australia        | 121.4                                |
| Eufaula Reservoir              | United States    | 354.9                                |
| Fehet Lake                     | Canada           | 105.7                                |
| Flathead Lake                  | United States    | 487.6                                |
| Flores Reservoir               | Brazil           | 65.0                                 |
| Forde Lake                     | Canada           | 303.0                                |
| Fort Peck Lake                 | United States    | 814.2                                |
| Francis Case Lake              | United States    | 328.3                                |
| Gandhi Sagar Reservoir         | India            | 521.7                                |
| Garry Lake                     | Canada           | 787.0                                |
| Geneva Lake                    | Switzerland      | 558.2                                |
| Govind Ballabh Pant Sagar Lake | India            | 415.3                                |
| Grande do Curuai Lake          | Brazil           | 381.8                                |
| Grandin Lake                   | Canada           | 248.5                                |
| Grapevine Lake                 | United States    | 21. Feb                              |
| Great Bear Lake                | Canada           | 30530.1                              |
| Great Salt Lake                | United States    | 5965.8                               |
| Great Slave Lake               | Canada           | 27816.3                              |
| Guarabi Lake                   | Brazil           | 196.0                                |
| Guri Lake                      | Venezuela        | 3661.0                               |
| Hardisty Lake                  | Canada           | 319.4                                |
| Harlan County Lake             | United States    | 50.0                                 |
| Harry S Truman Reservoir       | United States    | 186.8                                |
| Hartwell Lake                  | United States    | 189.2                                |
| Hebgen Lake                    | United States    | 46.5                                 |
| Hottah Lake                    | Canada           | 955.1                                |
| Hubbard Creek Reservoir        | United States    | 43.1                                 |

| <b>Lake</b>               | <b>Country</b> | <b>Surface area [km<sup>2</sup>]</b> |
|---------------------------|----------------|--------------------------------------|
| Hulun Lake                | China          | 2166.5                               |
| Huron Lake                | Canada         | 59756.5                              |
| Hyargas Lake              | Mongolia       | 1362.7                               |
| Ilha Solteira Reservoir   | Brazil         | 1077.3                               |
| Ilmen Lake                | Russia         | 951.2                                |
| Inder Lake                | Kazakhstan     | 105.8                                |
| Issyk Kul Lake            | Kyrgyzstan     | 6258.9                               |
| Itaparica Reservoir       | Brazil         | 687.6                                |
| Itutinga Reservoir        | Brazil         | 56.3                                 |
| Izabal Lake               | Guatemala      | 737.6                                |
| Jacarei Reservoir         | Brazil         | 38.9                                 |
| Jurumirim Reservoir       | Brazil         | 373.5                                |
| Kabamba Lake              | Zaire          | 178.6                                |
| Kabele Lake               | Zaire          | 102.3                                |
| Kabwe Lake                | Zaire          | 100.8                                |
| Kainji Lake               | Nigeria        | 1034.8                               |
| Kajaki Reservoir          | Afghanistan    | 46.1                                 |
| Kamilukuak Lake           | Canada         | 672.1                                |
| Kaminuriak Lake           | Canada         | 565.4                                |
| Kapchagay Reservoir       | Kazakhstan     | 1273.0                               |
| Kara Bogaz Gol Lake       | Turkmenistan   | 918.9                                |
| Karakaya Baraji Reservoir | Turkey         | 194.9                                |
| Kariba Lake               | Zimbabwe       | 5276.2                               |
| Keller Lake               | Canada         | 390.7                                |
| Khantaiskoye Lake         | Russia         | 1441.7                               |
| Khuvs gul Lake            | Mongolia       | 2741.4                               |
| Kisale Lake               | Zaire          | 277.8                                |
| Kivu Lake                 | Zaire          | 2370.7                               |
| Koosa järv Lake           | Russia         | 3552.8                               |
| Kossou Lake               | Ivory Coast    | 500.3                                |
| Krasnoyarskoye Reservoir  | Russia         | 1629.6                               |
| Kremenchuk Reservoir      | Ukraine        | 1849.1                               |
| Kusai Lake                | China          | 255.7                                |
| Kuybyshev Reservoir       | Russia         | 5003.3                               |
| Kyoga Lake                | Uganda         | 1727.7                               |
| La Grande Reservoir       | Canada         | 2572.6                               |
| Lac Changalele Reservoir  | Congo (DRC)    | 179.6                                |
| Ladoga Lake               | Russia         | 17539.1                              |
| Lagdo Lake                | Cameroon       | 622.6                                |
| Lagoa da Funda Lake       | Angola         | 23. Jan                              |
| Lake of the Woods         | Canada         | 4167.7                               |
| Langa Co Lake             | China          | 277.5                                |
| Lesser Slave Lake         | Canada         | 1152.0                               |
| Llanquihue Lake           | Chile          | 865.9                                |
| Loups Marins Lake         | Canada         | 510.6                                |
| Luther Lake               | Canada         | 59756.5                              |
| Mai Ndombe Lake           | Zaire          | 1954.9                               |
| Maithan Dam Reservoir     | India          | 76.1                                 |
| Malawi Lake               | Malawi         | 29251.5                              |

| <b>Lake</b>              | <b>Country</b> | <b>Surface area [km<sup>2</sup>]</b> |
|--------------------------|----------------|--------------------------------------|
| Mallery Lake             | Canada         | 444.7                                |
| Managua Lake             | Nicaragua      | 1023.8                               |
| Manso Reservoir          | Brazil         | 49.4                                 |
| Marfil Lake              | Bolivia        | 104.9                                |
| Massingir Lake           | Mozambique     | 118.9                                |
| Maunoir Lake             | Canada         | 341.8                                |
| Mead Lake                | United States  | 581.0                                |
| Meredith Lake            | United States  | 35.0                                 |
| Michigan Lake            | United States  | 57399.4                              |
| Mille Lacs Lake          | United States  | 496.3                                |
| Mosul Dam Lake           | Iraq           | 346.9                                |
| Murray Lake              | United States  | 180.8                                |
| Musters Lake             | Argentina      | 407.8                                |
| Mweru Mantipa Lake       | Zambia         | 110.1                                |
| Mweru Lake               | Zambia         | 4944.8                               |
| Nam Co Lake              | China          | 1933.6                               |
| Nam Ngum Lake            | Laos           | 443.8                                |
| Nasser Lake              | Egypt          | 5383.3                               |
| Nettiling Lake           | Canada         | 5064.7                               |
| Netzahualcóyotl Lake     | Mexico         | 292.0                                |
| Ngangze Lake             | China          | 411.3                                |
| Nicaragua Lake           | Nicaragua      | 7851.5                               |
| Nipigon Lake             | Canada         | 4476.9                               |
| Norfolk Lake             | United States  | 79.4                                 |
| Nova Ponte Reservoir     | Brazil         | 237.3                                |
| Novosibirsk Reservoir    | Russia         | 1024.2                               |
| Nowleye Lake             | Canada         | 275.3                                |
| Nueltin Lake             | Canada         | 2011.9                               |
| Nzilo Reservoir          | Zaire          | 266.7                                |
| O. H. Ivie Reservoir     | United States  | 47.1                                 |
| Oahe Lake                | United States  | 1092.6                               |
| Okeechobee Lake          | United States  | 1436.8                               |
| Onega Lake               | Russia         | 9773.9                               |
| Ontario Lake             | Canada         | 19328.9                              |
| Oro Lake                 | Mali           | 110.3                                |
| Panchet Dam Reservoir    | India          | 47.9                                 |
| Peipus Lake              | Russia         | 3552.8                               |
| Pires Ferreira Reservoir | Brazil         | 45.0                                 |
| Poço da Cruz Reservoir   | Brazil         | 3.0                                  |
| Poopó Lake               | Bolivia        | 1262.9                               |
| Pórisvatn Lake           | Iceland        | 66.4                                 |
| Powell Lake              | United States  | 647.8                                |
| Poyang Lake              | China          | 2108.1                               |
| Qadisiyah Lake           | Iraq           | 339.2                                |
| Qarun Lake               | Egypt          | 232.7                                |
| Qinghai Lake             | China          | 4449.7                               |
| Rajghat Reservoir        | India          | 46.7                                 |
| Ramganga Reservoir       | India          | 47.2                                 |
| Ranco Lake               | Chile          | 441.9                                |

| <b>Lake</b>                 | <b>Country</b> | <b>Surface area [km<sup>2</sup>]</b> |
|-----------------------------|----------------|--------------------------------------|
| Rathbun Lake                | United States  | 50.6                                 |
| Ray Roberts Reservoir       | United States  | 68.7                                 |
| Razazza Lake                | Iraq           | 1330.3                               |
| Reindeer Lake               | Canada         | 5596.6                               |
| Richland Chambers Reservoir | United States  | 156.5                                |
| Robert Bourassa Reservoir   | Canada         | 3107.6                               |
| Rockinghorse Lake           | Canada         | 221.5                                |
| Roseires Reservoir          | Sudan          | 225.2                                |
| Rukwa Lake                  | Tanzania       | 1965.8                               |
| Rweru Lake                  | Burundi        | 102.4                                |
| Rybinsk Reservoir           | Russia         | 3926.6                               |
| Saint Jean Lake             | Canada         | 1106.2                               |
| Sakakawea Lake              | United States  | 1126.8                               |
| Salton Sea                  | United States  | 929.0                                |
| Sam Rayburn Reservoir       | United States  | 380.1                                |
| Sao Geronimo Lake           | Brazil         | 104.7                                |
| Saratovsk Reservoir         | Russia         | 1073.4                               |
| Sarygamysh Lake             | Turkmenistan   | 752.4                                |
| Schultz Lake                | Canada         | 418.0                                |
| Selingue Reservoir          | Mali           | 335.7                                |
| Seminole Reservoir          | United States  | 57.2                                 |
| Serra de Mesa Reservoir     | Brazil         | 922.7                                |
| Sevan Lake                  | Armenia        | 1249.9                               |
| Shadehill Reservoir         | United States  | 17. Feb                              |
| Shala Lake                  | Ethiopia       | 310.5                                |
| Siling Co Lake              | China          | 1640.9                               |
| Sobradinho Reservoir        | Brazil         | 2614.9                               |
| Songhua Lake                | China          | 193.3                                |
| South Henrik Lake           | Canada         | 569.6                                |
| Stockton Lake               | United States  | 96.4                                 |
| Strom Thurmond Lake         | United States  | 131.4                                |
| Sudd Swamps                 | Sudan          | 161.3                                |
| Superior Lake               | Canada         | 81935.7                              |
| Table Rock Lake             | United States  | 118.1                                |
| Tai Hu Lake                 | China          | 2398.5                               |
| Takijuq Lake                | Canada         | 1013.9                               |
| Tana Lake                   | Ethiopia       | 3034.7                               |
| Tanganyika Lake             | Zaire          | 32820.5                              |
| Tangra Yumco Lake           | China          | 828.2                                |
| Tarbela Reservoir           | Pakistan       | 208.4                                |
| Taupo Lake                  | New Zealand    | 600.5                                |
| Tawakoni Lake               | United States  | 137.7                                |
| Tebesjuak Lake              | Canada         | 488.6                                |
| Tehek Lake                  | Canada         | 491.1                                |
| Tengiz Lake                 | Kazakhstan     | 1382.6                               |
| Teshekpuk Lake              | United States  | 834.9                                |
| Tharthar Lake               | Iraq           | 1698.8                               |
| Titicaca Lake               | Peru           | 8270.6                               |
| Toba Lake                   | Indonesia      | 1133.8                               |

| <b>Lake</b>                  | <b>Country</b> | <b>Surface area [km<sup>2</sup>]</b> |
|------------------------------|----------------|--------------------------------------|
| Todos los Santos Lake        | Chile          | 175.6                                |
| Toktogul Reservoir           | Kyrgyzstan     | 223.5                                |
| Toledo Bend Reservoir        | United States  | 599.6                                |
| Tres Irmaos Reservoir        | Brazil         | 591.8                                |
| Tschida Lake                 | United States  | 10. Apr                              |
| Tshchikskoye Lake            | Russia         | 269.2                                |
| Tsimlyansk Reservoir         | Russia         | 2242.4                               |
| Tucurui Reservoir            | Brazil         | 2349.1                               |
| Tulemalu Lake                | Canada         | 656.8                                |
| Tumba Lake                   | Zaire          | 697.0                                |
| Turkana Lake                 | Kenya          | 7785.4                               |
| Ubinskoye Lake               | Russia         | 433.3                                |
| Ukai Reservoir               | India          | 370.2                                |
| Ulungur Lake                 | China          | 757.5                                |
| Unknown Reservoir            | India          | 30.0                                 |
| Unknown Reservoir            | Mexico         | 134.9                                |
| Unknown Target               | Mexico         | 141.4                                |
| Upemba Lake                  | Zaire          | 573.0                                |
| Urmia Lake                   | Iran           | 4963.4                               |
| Urua Lake                    | Brazil         | 196.0                                |
| Uvs Lake                     | Mongolia       | 3421.5                               |
| Van Lake                     | Turkey         | 3537.9                               |
| Vänern Lake                  | Sweden         | 5550.5                               |
| Vani Vilasa Sagara Reservoir | India          | 39.3                                 |
| Victoria Lake                | Tanzania       | 67075.2                              |
| Viedma Lake                  | Argentina      | 1047.4                               |
| Volta Lake                   | Ghana          | 6043.9                               |
| Walker Lake                  | United States  | 165.5                                |
| Wharton Lake                 | Canada         | 407.1                                |
| Williston Lake               | Canada         | 1654.0                               |
| Winnipegosis Lake            | Canada         | 5167.1                               |
| Wollaston Lake               | Canada         | 2272.0                               |
| Yathkyed Lake                | Canada         | 1320.4                               |
| Yellowstone Lake             | United States  | 327.8                                |
| Zanzulu Reservoir            | Angola         | 123.1                                |
| Zaysan Lake                  | Kazakhstan     | 4193.7                               |
| Zeyskoye Reservoir           | Russia         | 2234.8                               |
| Zhari Namco Lake             | China          | 1004.4                               |
| Zimbambo Lake                | Zaire          | 204.7                                |
| Ziway Lake                   | Ethiopia       | 410.5                                |
| Zujar Reservoir              | Spain          | 93.1                                 |

## S2 Determination of surface water extent

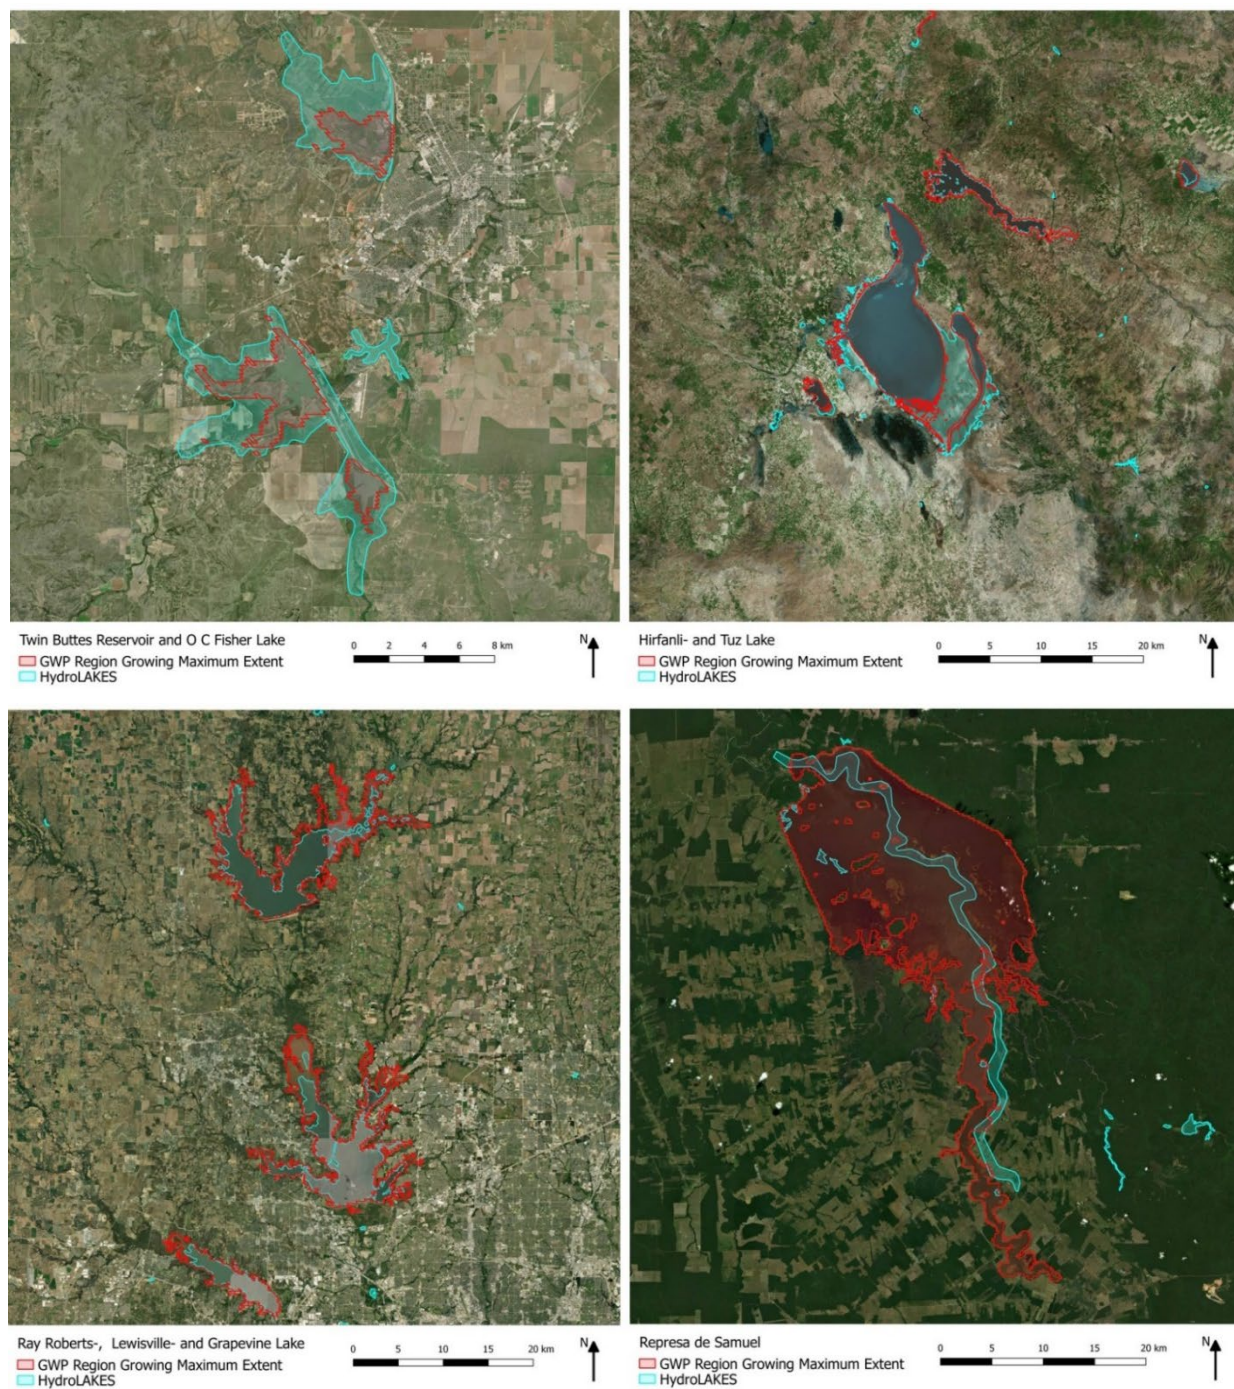

**Figure S2: Estimated maximum extent of four lakes with comparison to the HydroLAKES dataset. Examples show the correction of overestimation (top) and underestimation (bottom) of surface water extent by a static approximation (blue). The red GWP shapes are the final shapes used for RECOG-LR. (Background: Bing Maps, © Microsoft)**



### S3 Seasonal cycle of RECOG-LR

#### Exemplary seasonal cycle of RECOG-LR RL01

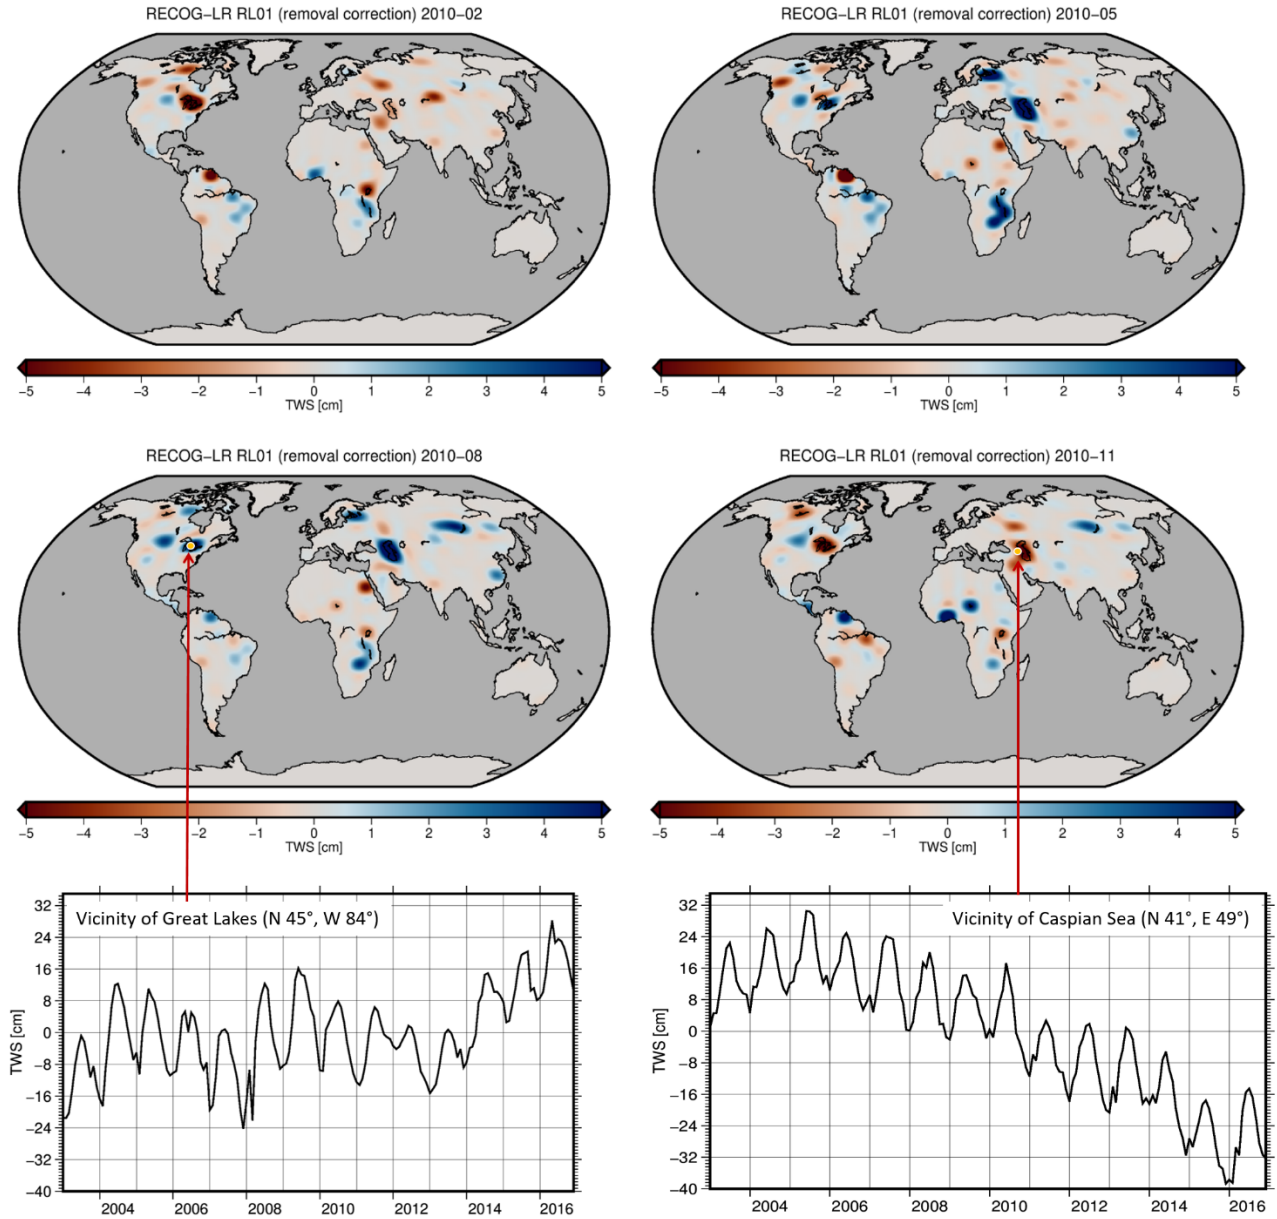

**Figure S3: Monthly correction results for February (top left), May (top right), August (middle left) and November (middle right) of 2010. Note that for better visibility of the smaller lakes, the very strong signals (e.g. for the Caspian Sea and the Great Lakes, see time series on bottom row) go beyond the scale of  $\pm 5$  cm.**

S4 Altimetry time series for the Great Lakes

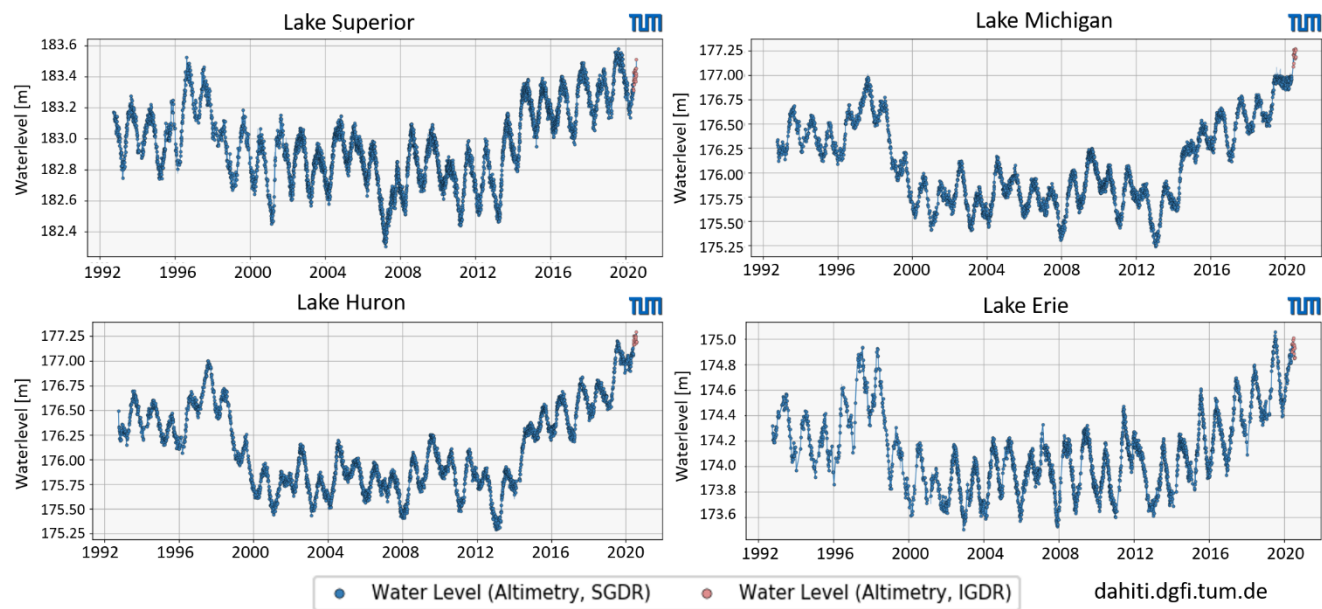

Figure S4: Time series of Great Lakes in North America from the DAHITI database.

## S5 Linear trends of Earthquake correction for Sumatra-Andaman earthquake 2004

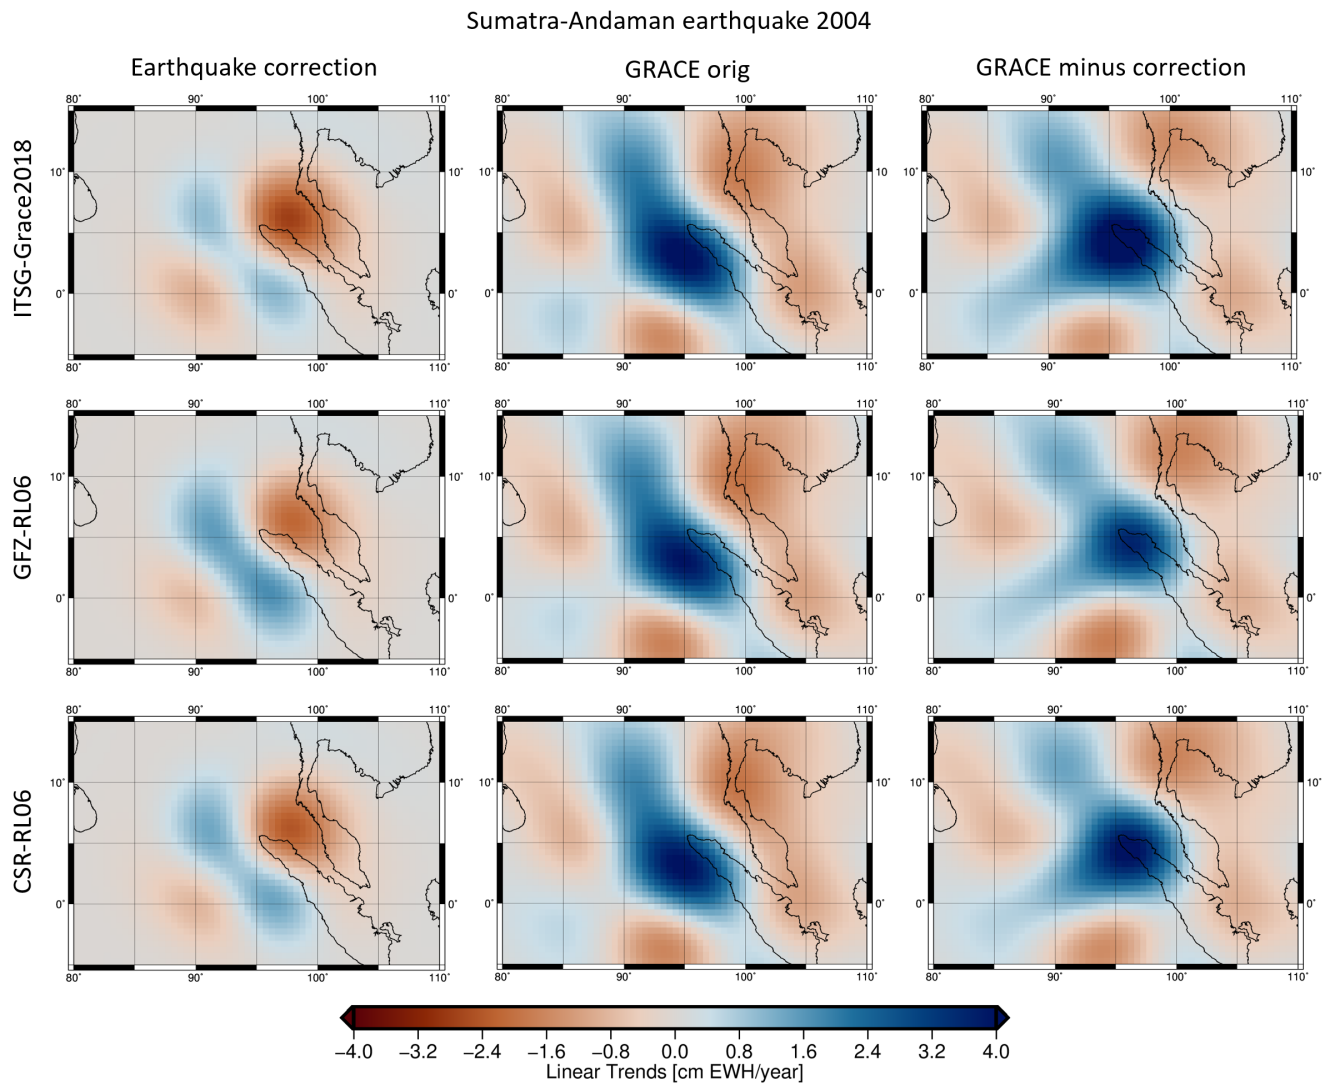

**Figure S5: Comparison of linear trends (01/2003 – 12/2016) of the earthquake correction (left), the original (middle) and corrected TWS changes (right) in cm EWH/year for the different GRACE solutions ITSG-Grace2018 (top), GFZ-RL06 (middle) and CSR-RL06 (bottom) of the Sumatra-Andaman earthquake from 2004.**

## S6 Linear trends of Earthquake correction for Tohoku earthquake 2011

Tohoku earthquake 2011

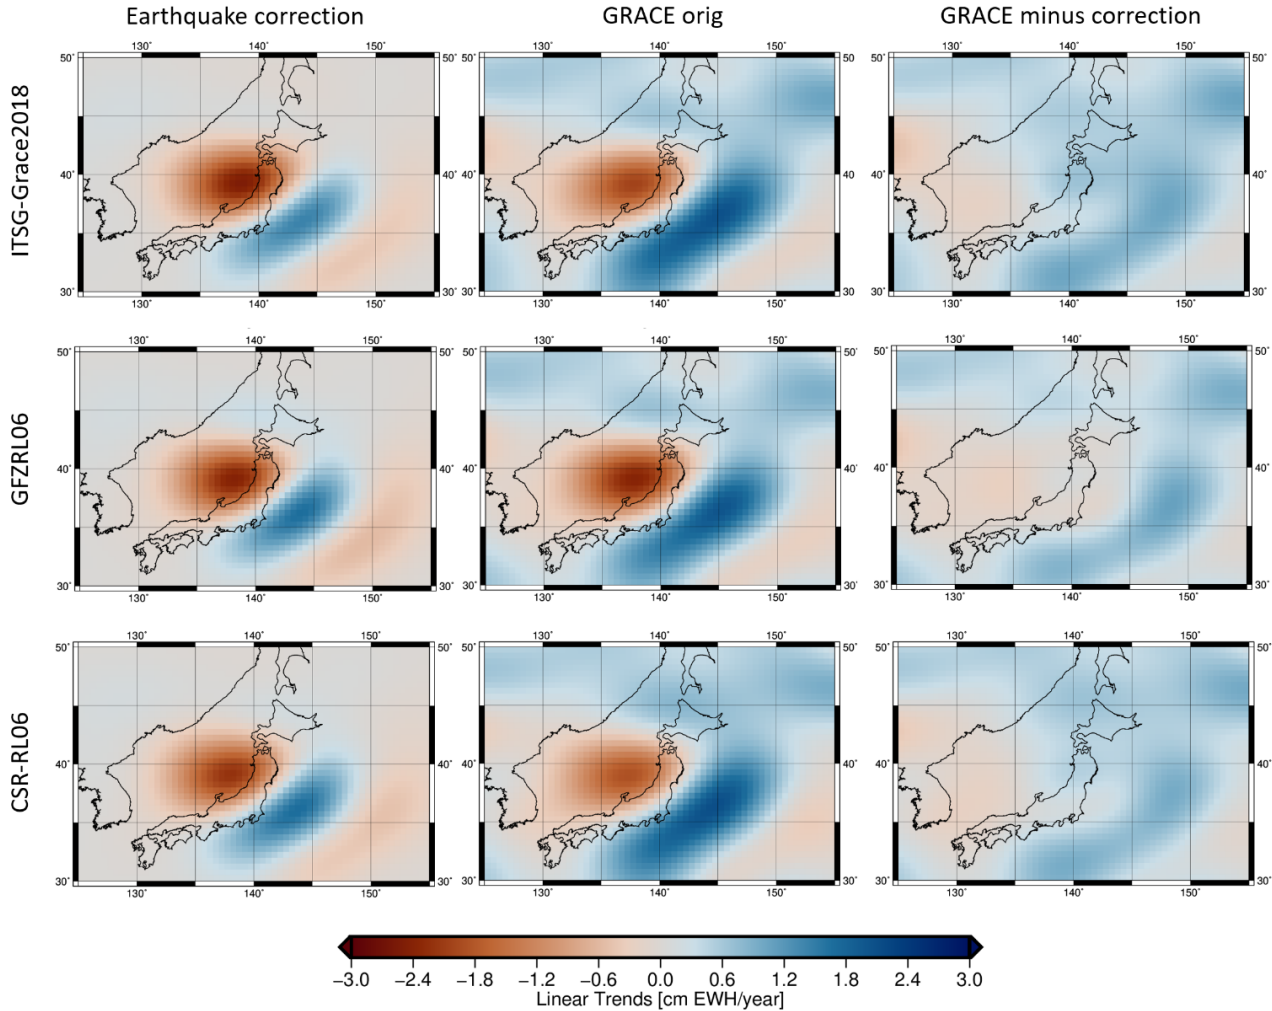

**Figure S6: Comparison of linear trends (01/2003 – 12/2016) of the earthquake correction (left), the original (middle) and corrected TWS changes (right) in cm EWH/year for the different GRACE solutions ITSG-Grace2018 (top), GFZ-RL06 (middle) and CSR-RL06 (bottom) of the Tohoku earthquake from 2011.**

Figures S5 and S6 show the comparison of the linear trends for the correction, the original and corrected total water storage changes for different GRACE solutions. The ITSG-Grace2018 solution is discussed in more detail in the paper, but the main findings describe that the linear trends in the Sumatra-Andaman regions and the Tohoku region are biased by the earthquake signal. For the Sumatra-Andaman region this led to a medium change in magnitude and spatial pattern, while in Tohoku large differences between the uncorrected and corrected GRACE signal appeared. The linear trends were very close to zero after correcting the GRACE data. The GFZ-RL06 and CSR-RL06 solutions show now that very similar linear trends can be observed when comparing the original data, regardless of the earthquake considered. The earthquake correction can continue these findings. Each solution is in the same magnitude and identifies equal regions that are affected. Therefore, it is very important to correct the GRACE data for earthquakes to avoid misinterpretations in hydrological applications. We provide the earthquake correction RECOG-EQ for all three solutions on Pangaea as described in the paper.

**S7 Influence of lake correction RECGO-LR on GRACE trends**

Influence of lake/reservoir correction RECOG-LR on trend estimates in GRACE

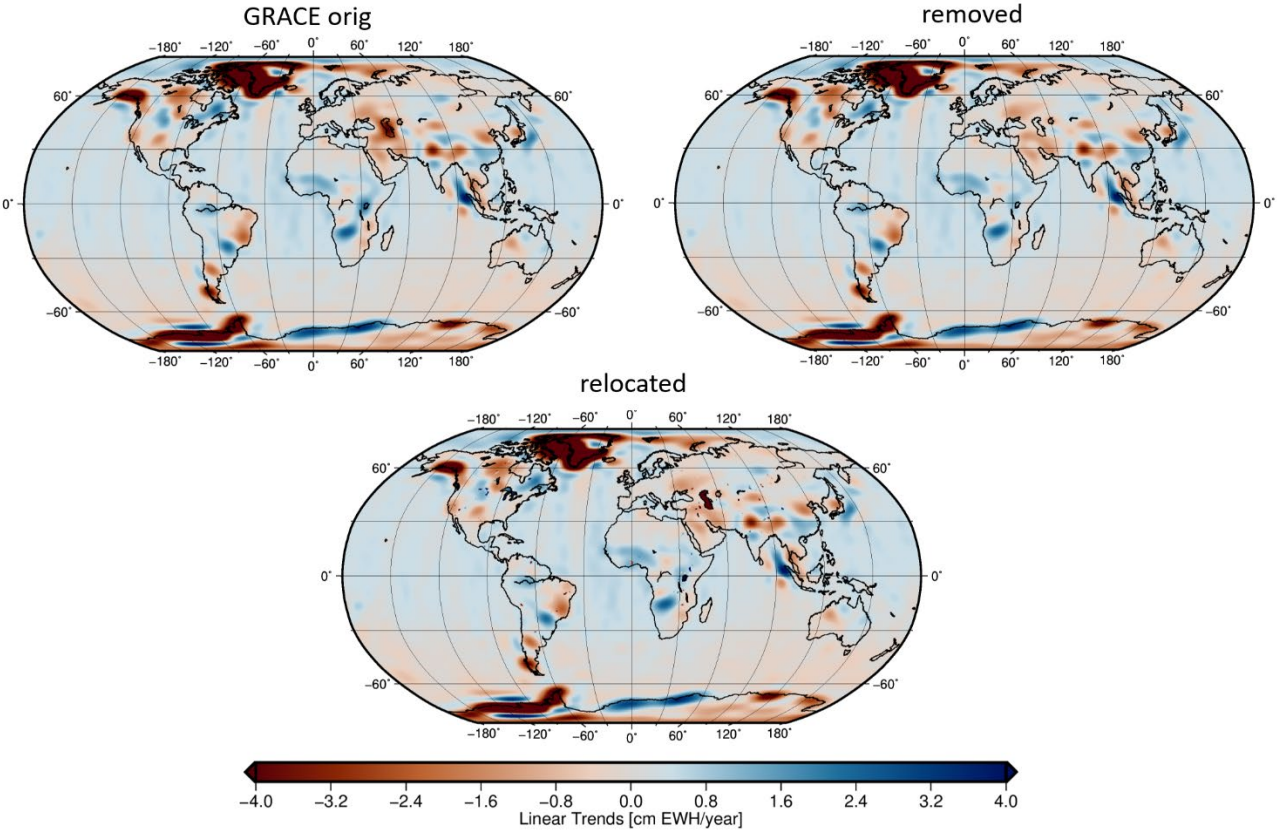

**Figure S7: Global map of trends in the original GRACE data (top left), after removing the surface water correction RECOG-LR (top right) and after relocating the altimetry-derived surface water storage to its original location (bottom).**

## S8 Assimilation of GRACE data into the hydrological model WaterGAP

Assimilation of subbasin-averaged TWSA time series of the original and the RECOG-corrected GRACE dataset was performed into the Water-Global Assessment and Prognosis (WaterGAP; Döll et al. 1999, Müller Schmied et al., 2014) hydrological model. WaterGAP is a global hydrological model simulating ten water compartments (snow, canopy, soil, groundwater, global/local lakes, global/local wetlands, reservoirs, and river) for each grid cell of a global  $0.5^\circ \times 0.5^\circ$  grid considering human influences on water resources.

Our assimilation theory follows Eicker et al. (2014) and Schumacher et al. (2015, 2016), but to improve the computation time of the data assimilation we coupled the model with the Parallel Data Assimilation Framework (PDAF; Nerger and Hiller, 2013). Perturbing the calibration parameters of the model as well as temperature and precipitation as forcing data, we generate 30 ensemble members and apply an Ensemble Kalman Filter, which is tuned with a forgetting factor of 0.8 (Evensen, 2003). During the assimilation of the original and relocated dataset, we update all ten compartments of the WaterGAP, while we do not update the lakes and reservoirs when considering the removed dataset. To enable a fair comparison of the influence of the correction dataset, we use the same propagated error information for both datasets for assimilation.

### References:

- Döll, P., Kaspar, F., and Alcamo, J.: Computation of global water availability and water use at the scale of large drainage basins, *Mathematische Geologie*, 4(1), 111-18, 1999.
- Eicker, A., Schumacher, M., Kusche, J., Döll, P. and Müller Schmied, H.: Calibration/Data Assimilation Approach for Integrating GRACE Data into the WaterGAP Hydrological Model (WGHM) Using an Ensemble Kalman Filter: First Results, *Surv Geophys*, 35, 1285-1309, doi:10.1007/s10712-014-9309-8, 2014.
- Evensen, G.: The ensemble Kalman filter: Theoretical formulation and practical implementation, *Ocean dynamics*, 53(4), 343-367, 2003.
- Nerger, L., and Hiller, W.: Software for ensemble-based data assimilation systems – Implementation strategies and scalability, *Computers & Geosciences*, 55, 110-118, 2013.
- Schumacher, M., Eicker, A., Kusche, J., Schmied, H. M., and Döll, P.: Covariance analysis and sensitivity studies for GRACE assimilation into WGHM, *IAG 150 Years*, 241-247, Springer, Cham, 2015.
- Schumacher, M., Kusche, J., and Döll, P.: A systematic impact assessment of GRACE error correlation on data assimilation in hydrological models, *Journal of Geodesy*, 90(6), 537-559, 2016.



## S9 GRACE TWSA time series at epicentres of earthquakes

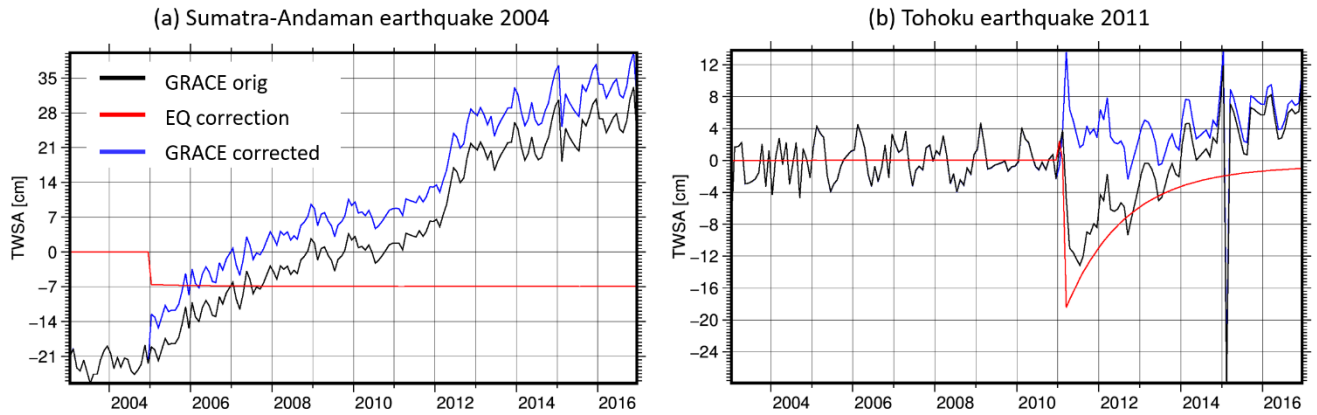

**Figure S9: GRACE TWSA at the chosen grid that is closest to the epicenter of the (a) Sumatra-Andaman earthquake in 2004 (epicenter location: 3.32° N, 95.85° E, closest to TWSA grid location: 3.25° N, 95.75° E) and the (b) Tohoku earthquake in 2011 (epicenter location: 38.32° N, 142.37° E, closest to TWSA grid location: 38.25° N, 142.25° E) shown for the original (black) and the corrected (blue) GRACE total water storage anomalies earthquake correction.**

Figure S9 shows the time series for the GRACE at the closest location to the epicenters for the Sumatra-Andaman earthquake in 2004 and the Tohoku earthquake in 2011. For Sumatra-Andaman the location with 97.75 degrees east and 3.25 degrees north is chosen. The correction (red) shows a clear visible step function, but less influence of a post-seismic relaxation. It is important to understand that the earthquake correction models are fitted to the geoid or gravity anomalies in the space domain, i.e. to gridded representations. Transforming from geoid to TWSA requires spatial smoothing operations such that the temporal evolution of individual grid corrections are overlaid. As a result one cannot expect to see the original relaxation effect as clearly as e.g. in Einarsson et al. (2009).

## S10 Vertical surface displacement at ITRF2014 GNSS sites

Vertical station displacements at ITRF2014 GNSS stations

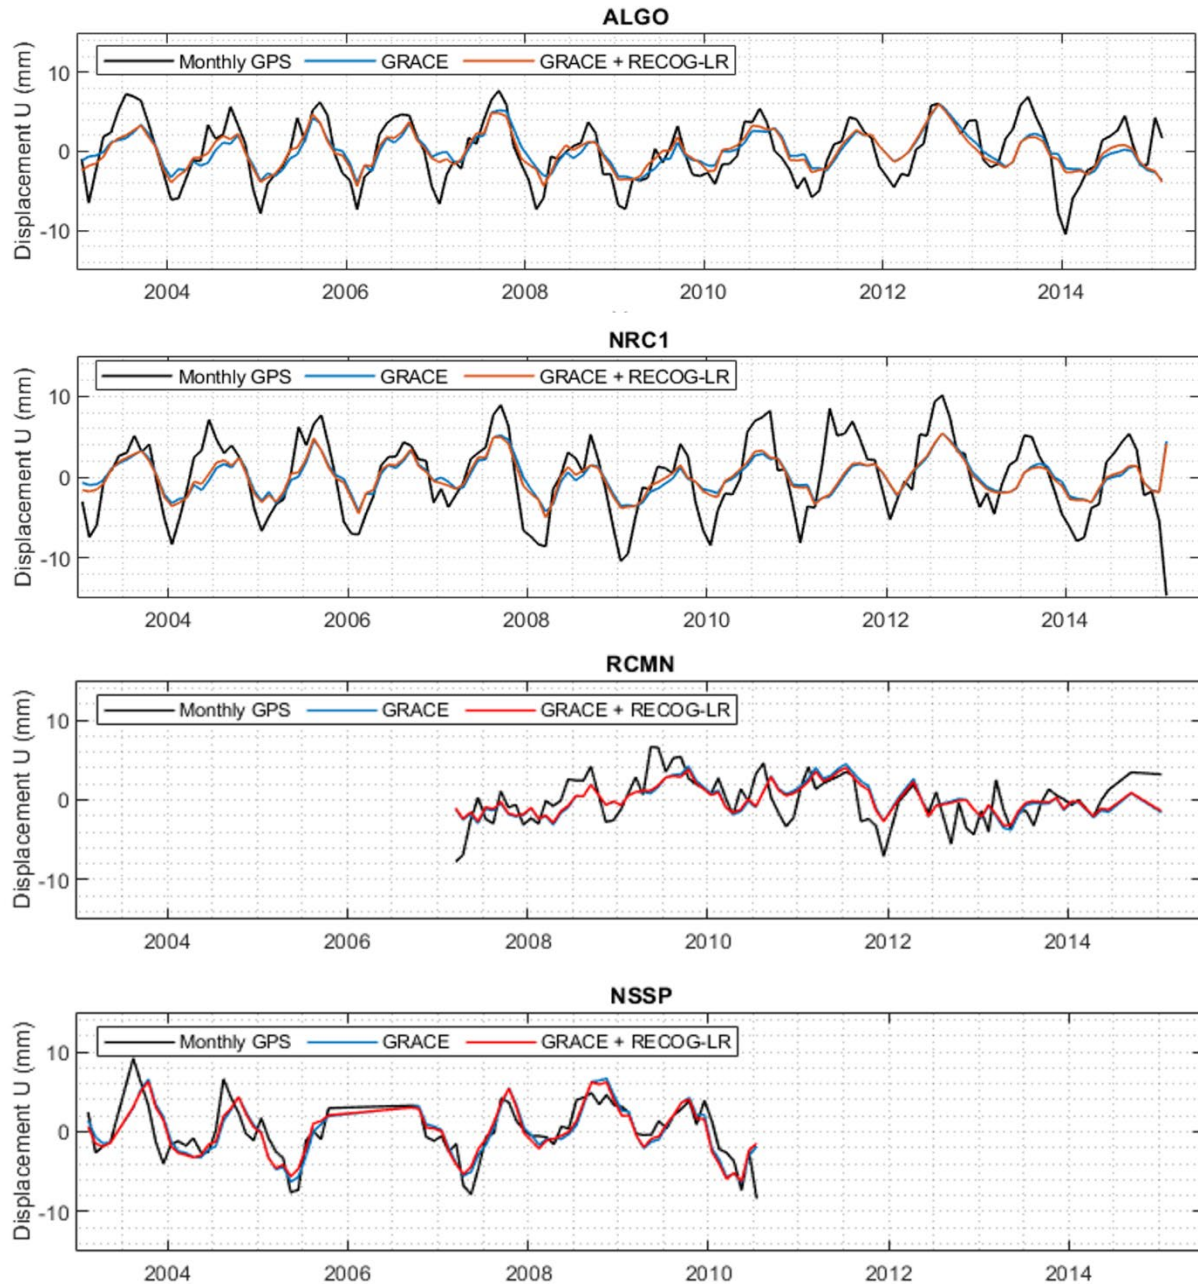

**Figure S10:** Vertical surface displacement at four ITRF2014 GNSS sites located in the Great Lakes region (ALGO and NRC1), around Lake Victoria (RCMN) and the Caspian Sea (NSSP). The black line shows the GNSS observations and the blue line the surface displacements modelled from the original GRACE time series. The red line illustrates the displacement time series after removing the leakage correction (RECOG-LR RL01) and relocating the altimetry-derived surface water storage change to its original location.
